# Supplementary material for: Loss of Rare Fish Species from Tropical Floodplain Food Webs Affects Community Structure and Ecosystem Multifunctionality in a Mesocosm Experiment
Source: PubMed Central journal article supplement (PMC3885587; doi:10.1371/journal.pone.0084568), 2014-01-08
Supplement: pone.0084568.s003.pdf [file pone.0084568.s003.pdf]

**Table S1.** Diet composition and trophic guild classification of 18 species used in experimental manipulations based on primary literature†. Black and grey fill represent primary and secondary diet item, respectively.

| Species                                | Trophic guild              | Zoo-plankton | Aquatic/terrestrial insects | Fishes | Algae | Higher plants | Detritus/sediment |
|----------------------------------------|----------------------------|--------------|-----------------------------|--------|-------|---------------|-------------------|
| <i>Serrapinnus</i> sp 1*               | algivore                   |              |                             |        | ■     |               |                   |
| <i>Astyanax altiparanae</i>            | insectivore                |              | ■                           | ■      |       | ■             |                   |
| <i>Moenkhausia forestii</i>            | zooplanktivore/insectivore | ■            | ■                           |        | ■     |               |                   |
| <i>Hyphessobrycon eques</i>            | zooplanktivore             | ■            |                             |        | ■     |               |                   |
| <i>Aphyocharax anisitsi</i>            | zooplanktivore/insectivore | ■            | ■                           |        |       |               |                   |
| <i>Steindachnerina insculpta</i>       | detrivore/algivore         |              |                             |        | ■     |               | ■                 |
| <i>Psellogrammus kennedyi</i>          | zooplanktivore/insectivore | ■            | ■                           |        |       |               |                   |
| <i>Loricariichthys platymetopon</i>    | detrivore                  |              |                             |        |       |               | ■                 |
| <i>Roeboides descavadensis</i>         | zooplanktivore             | ■            | ■                           | ■      |       |               |                   |
| <i>Hoplias</i> aff. <i>malabaricus</i> | piscivore                  |              |                             | ■      |       |               |                   |
| <i>Characidium</i> aff. <i>zebra</i>   | insectivore                |              | ■                           |        |       |               |                   |
| <i>Serrapinnus notomelas</i>           | algivore                   |              |                             |        | ■     |               |                   |
| <i>Moenkhausia bonita</i>              | insectivore                |              | ■                           |        |       |               |                   |
| <i>Acestrorhynchus lacustris</i>       | piscivore                  |              | ■                           | ■      |       |               |                   |
| <i>Aphyocharax dentatus</i>            | zooplanktivore/insectivore | ■            | ■                           |        |       |               |                   |
| <i>Steindachnerina brevipinna</i> *    | detrivore/algivore         |              |                             |        | ■     |               | ■                 |
| <i>Pyrrhulina australis</i>            | insectivore                |              | ■                           |        |       |               |                   |
| <i>Serrasalmus marginatus</i>          | piscivore                  |              | ■                           | ■      |       |               |                   |

†Diet data from [23,54-61]

\* Diet and trophic guild classification based on congener

23. Thomaz SM, Agostinho AA, Hahn NS (2004) The upper Paraná River and its floodplain – physical aspects, ecology, and conservation. Leiden, The Netherlands: Backhuys Publishers. 393 p.
54. Benine RC, Castro RMC, Sabino J (2004) *Moenkhausia bonita*: a new small characin fish from the Rio Paraguay basin, southwestern Brazil (Characiformes: Characidae). *Copeia* 2004: 68-73.
55. Correia CE, Hahn NS, Delariva RL (2009) Extreme trophic segregation between sympatric fish species: the case of small sized body *Aphyocharax* in the Brazilian Pantanal. *Hydrobiologia* 635: 57-65.
56. Crippa VEL, Hahn NS, Fugi R (2009) Food resource used by small-sized fish in macrophyte patches in ponds of the upper Paraná river floodplain. *Acta Sci Biol Sci* 31: 119-125.
57. Esteves KE, Lobo AVP, Faria MDR (2008) Trophic structure of a fish community along environmental gradients of a subtropical river (Paraitinga River, Upper Tietê River Basin, Brazil). *Hydrobiologia* 598: 373–387.
58. Graca WJ, Pavanelli CS (2007) Peixes da planície de inundação do alto rio Paraná e áreas adjacentes. Maringá, Brazil: Editora do Universidade Estadual de Maringá.
59. Pelicice FM, Agostinho AA (2006) Feeding ecology of fishes associated with *Egeria* spp. patches in a tropical reservoir, Brazil *Ecol Freshw Fish* 15: 10–19.
60. Peretti D, Andrian IF (2004) Trophic structure of fish assemblages in five permanent lagoons of the high Paraná River floodplain, Brazil. *Environ Biol Fish* 71: 95-103.
61. Russo MR, Hahn NS (2006) Importance of zooplankton in the diet of a small fish in lagoons of the upper Paraná River floodplain, Brazil. *Acta Limnol Bras* 18: 357-366.
