# Supplementary material for: Loss of Rare Fish Species from Tropical Floodplain Food Webs Affects Community Structure and Ecosystem Multifunctionality in a Mesocosm Experiment
Source: PubMed Central journal article supplement (PMC3885587; doi:10.1371/journal.pone.0084568), 2014-01-08
Supplement: pone.0084568.s006.pdf [file pone.0084568.s006.pdf]

**Table S4.** Mixed model, repeated measures ANOVA for each response variable and associated covariate models with direct trophic interactions. When a significant treatment by time interaction was observed, SLICE effects are reported. Significant results in bold ( $\alpha = 0.05$ ).

| Model                    | Transformation | Effect           | nDF | dDF | F     | p                 | treatment x time slices |     |     |       |                   |
|--------------------------|----------------|------------------|-----|-----|-------|-------------------|-------------------------|-----|-----|-------|-------------------|
|                          |                |                  |     |     |       |                   | Time                    | nDF | dDF | F     | p                 |
| <b>N<sub>1</sub></b>     | log10          | treatment        | 5   | 18  | 19.25 | <b>&lt;0.0001</b> | 1                       | 5   | 18  | 12.37 | <b>&lt;0.0001</b> |
|                          |                | time             | 3   | 18  | 12.54 | <b>0.0001</b>     | 2                       | 5   | 18  | 17.3  | <b>&lt;0.0001</b> |
|                          |                | treatment x time | 15  | 18  | 4.34  | <b>0.002</b>      | 3                       | 5   | 18  | 24.43 | <b>&lt;0.0001</b> |
|                          |                | fish biomass     | 1   | 18  | 52.57 | <b>&lt;0.0001</b> | 4                       | 5   | 18  | 23.49 | <b>&lt;0.0001</b> |
| <b>N<sub>2</sub></b>     | log10          | treatment        | 5   | 18  | 11.65 | <b>&lt;0.0001</b> | 1                       | 5   | 18  | 1.72  | 0.1808            |
|                          |                | time             | 3   | 18  | 37.44 | <b>&lt;0.0001</b> | 2                       | 5   | 18  | 8.05  | <b>0.0004</b>     |
|                          |                | treatment x time | 15  | 18  | 6.4   | <b>0.0002</b>     | 3                       | 5   | 18  | 12.59 | <b>&lt;0.0001</b> |
|                          |                | phytoplankton    | 1   | 18  | 6.77  | <b>0.018</b>      | 4                       | 5   | 18  | 8.32  | <b>0.0003</b>     |
| <b>N<sub>3</sub></b>     | log10          | treatment        | 5   | 18  | 18.5  | <b>&lt;0.0001</b> | 1                       | 5   | 18  | 3.07  | <b>0.0356</b>     |
|                          |                | time             | 3   | 18  | 58.61 | <b>&lt;0.0001</b> | 2                       | 5   | 18  | 14.57 | <b>&lt;0.0001</b> |
|                          |                | treatment x time | 15  | 18  | 7.39  | <b>&lt;0.0001</b> | 3                       | 5   | 18  | 15.93 | <b>&lt;0.0001</b> |
|                          |                |                  |     |     |       |                   | 4                       | 5   | 18  | 11.88 | <b>&lt;0.0001</b> |
| <b>P<sub>1</sub></b>     | log10          | treatment        | 5   | 18  | 25.02 | <b>&lt;0.0001</b> | 1                       | 5   | 18  | 14.21 | <b>&lt;0.0001</b> |
|                          |                | time             | 3   | 18  | 33.86 | <b>&lt;0.0001</b> | 2                       | 5   | 18  | 31.74 | <b>&lt;0.0001</b> |
|                          |                | treatment x time | 15  | 18  | 10.76 | <b>&lt;0.0001</b> | 3                       | 5   | 18  | 16.94 | <b>&lt;0.0001</b> |
|                          |                | phytoplankton    | 1   | 18  | 7.05  | <b>0.0161</b>     | 4                       | 5   | 18  | 11.58 | <b>&lt;0.0001</b> |
|                          |                | zooplankton      | 1   | 18  | 8.46  | <b>0.0094</b>     |                         |     |     |       |                   |
| <b>P<sub>2</sub></b>     | log10          | treatment        | 5   | 18  | 23.34 | <b>&lt;0.0001</b> | 1                       | 5   | 18  | 14.7  | <b>&lt;0.0001</b> |
|                          |                | time             | 3   | 18  | 31.19 | <b>&lt;0.0001</b> | 2                       | 5   | 18  | 30.66 | <b>&lt;0.0001</b> |
|                          |                | treatment x time | 15  | 18  | 9.97  | <b>&lt;0.0001</b> | 3                       | 5   | 18  | 15.95 | <b>&lt;0.0001</b> |
|                          |                | phytoplankton    | 1   | 18  | 9.98  | <b>0.0054</b>     | 4                       | 5   | 18  | 11.31 | <b>&lt;0.0001</b> |
| <b>P<sub>3</sub></b>     | log10          | treatment        | 5   | 18  | 33.78 | <b>&lt;0.0001</b> | 1                       | 5   | 18  | 24.72 | <b>&lt;0.0001</b> |
|                          |                | time             | 3   | 18  | 38.09 | <b>&lt;0.0001</b> | 2                       | 5   | 18  | 47.77 | <b>&lt;0.0001</b> |
|                          |                | treatment x time | 15  | 18  | 12.17 | <b>&lt;0.0001</b> | 3                       | 5   | 18  | 19.07 | <b>&lt;0.0001</b> |
|                          |                | zooplankton      | 1   | 18  | 11.45 | <b>0.0033</b>     | 4                       | 5   | 18  | 13.91 | <b>&lt;0.0001</b> |
| <b>P<sub>4</sub></b>     | log10          | treatment        | 5   | 18  | 12.62 | <b>&lt;0.0001</b> | 1                       | 5   | 18  | 5.41  | <b>0.0033</b>     |
|                          |                | time             | 3   | 18  | 24.36 | <b>&lt;0.0001</b> | 2                       | 5   | 18  | 7.82  | <b>0.0005</b>     |
|                          |                | treatment x time | 15  | 18  | 7.36  | <b>&lt;0.0001</b> | 3                       | 5   | 18  | 17.26 | <b>&lt;0.0001</b> |
|                          |                | fish biomass     | 1   | 18  | 15.22 | <b>0.001</b>      | 4                       | 5   | 18  | 13.2  | <b>&lt;0.0001</b> |
| <b>phyto<sub>1</sub></b> | log10          | treatment        | 5   | 18  | 16.92 | <b>&lt;0.0001</b> |                         |     |     |       |                   |
|                          |                | time             | 3   | 18  | 11.4  | <b>0.0002</b>     |                         |     |     |       |                   |

|                    |       |                  |    |    |        |                   |   |   |    |       |                   |
|--------------------|-------|------------------|----|----|--------|-------------------|---|---|----|-------|-------------------|
|                    |       | treatment x time | 15 | 18 | 2.06   | 0.0734            |   |   |    |       |                   |
| phyto <sub>2</sub> | log10 | treatment        | 5  | 18 | 4.13   | <b>0.0112</b>     |   |   |    |       |                   |
|                    |       | time             | 3  | 18 | 1.82   | 0.1804            |   |   |    |       |                   |
|                    |       | treatment x time | 15 | 18 | 1.7    | 0.1408            |   |   |    |       |                   |
|                    |       | fish biomass     | 1  | 18 | 5.9    | <b>0.0259</b>     |   |   |    |       |                   |
| zoo <sub>1</sub>   | log10 | treatment        | 5  | 18 | 12.17  | <b>&lt;0.0001</b> |   |   |    |       |                   |
|                    |       | time             | 3  | 18 | 13.91  | <b>&lt;0.0001</b> |   |   |    |       |                   |
|                    |       | treatment x time | 15 | 18 | 0.089  | 0.5838            |   |   |    |       |                   |
|                    |       | fish biomass     | 1  | 18 | 40.91  | <b>&lt;0.0001</b> |   |   |    |       |                   |
| BOM <sub>1</sub>   | none  | treatment        | 5  | 18 | 1.56   | 0.2224            |   |   |    |       |                   |
|                    |       | time             | 3  | 18 | 11.72  | <b>0.0002</b>     |   |   |    |       |                   |
|                    |       | treatment x time | 15 | 18 | 0.87   | 0.6006            |   |   |    |       |                   |
| BOM <sub>2</sub>   | none  | treatment        | 5  | 18 | 1.82   | 0.1591            |   |   |    |       |                   |
|                    |       | time             | 3  | 18 | 11.97  | <b>0.0002</b>     |   |   |    |       |                   |
|                    |       | treatment x time | 15 | 18 | 0.87   | 0.6011            |   |   |    |       |                   |
|                    |       | fish biomass     | 1  | 18 | 3.55   | 0.0756            |   |   |    |       |                   |
| GPP <sub>1</sub>   | log10 | treatment        | 5  | 18 | 30.22  | <b>&lt;0.0001</b> | 1 | 5 | 18 | 5.62  | <b>0.0027</b>     |
|                    |       | time             | 3  | 18 | 37.69  | <b>&lt;0.0001</b> | 2 | 5 | 18 | 16.04 | <b>&lt;0.0001</b> |
|                    |       | treatment x time | 15 | 18 | 16.39  | <b>&lt;0.0001</b> | 3 | 5 | 18 | 23.85 | <b>&lt;0.0001</b> |
|                    |       | fish biomass     | 1  | 18 | 29.34  | <b>&lt;0.0001</b> | 4 | 5 | 18 | 52.3  | <b>&lt;0.0001</b> |
| GPP <sub>2</sub>   | log10 | treatment        | 5  | 18 | 46.96  | <b>&lt;0.0001</b> | 1 | 5 | 18 | 3.28  | <b>0.0281</b>     |
|                    |       | time             | 3  | 18 | 136.67 | <b>&lt;0.0001</b> | 2 | 5 | 18 | 45.17 | <b>&lt;0.0001</b> |
|                    |       | treatment x time | 15 | 18 | 31.61  | <b>&lt;0.0001</b> | 3 | 5 | 18 | 23.97 | <b>&lt;0.0001</b> |
|                    |       |                  |    |    |        |                   | 4 | 5 | 18 | 44.08 | <b>&lt;0.0001</b> |
| NPP <sub>1</sub>   | none  | treatment        | 5  | 18 | 23.26  | <b>&lt;0.0001</b> | 1 | 5 | 18 | 2.96  | <b>0.0401</b>     |
|                    |       | time             | 3  | 18 | 33.08  | <b>&lt;0.0001</b> | 2 | 5 | 18 | 10.02 | <b>0.0001</b>     |
|                    |       | treatment x time | 15 | 18 | 18.9   | <b>&lt;0.0001</b> | 3 | 5 | 18 | 11.01 | <b>&lt;0.0001</b> |
|                    |       |                  |    |    |        |                   | 4 | 5 | 18 | 19.07 | <b>&lt;0.0001</b> |
| NPP <sub>2</sub>   | none  | treatment        | 5  | 18 | 6.42   | <b>0.0014</b>     | 1 | 5 | 18 | 1.03  | 0.4313            |
|                    |       | time             | 3  | 18 | 11.9   | <b>0.0002</b>     | 2 | 5 | 18 | 3.59  | <b>0.02</b>       |
|                    |       | treatment x time | 15 | 18 | 8.81   | <b>&lt;0.0001</b> | 3 | 5 | 18 | 5     | <b>0.0048</b>     |
|                    |       | fish biomass     | 1  | 18 | 5.6    | <b>0.0293</b>     | 4 | 5 | 18 | 14.69 | <b>&lt;0.0001</b> |
