# Supplementary material for: Loss of Rare Fish Species from Tropical Floodplain Food Webs Affects Community Structure and Ecosystem Multifunctionality in a Mesocosm Experiment
Source: PubMed Central journal article supplement (PMC3885587; doi:10.1371/journal.pone.0084568), 2014-01-08
Supplement: pone.0084568.s007.pdf [file pone.0084568.s007.pdf]

**Appendix S1.** List of species present from community sampling data from isolated lagoons in the Upper Paraná River floodplain (n = 11) during 2000-2007 austral springs. Species above the dashed line represent the pool of species (n = 18) used in experimental treatments. Eighteen species represent 82% of the total abundance and 47% of total biomass of individuals with mean SL < 20 cm.

| Species                                 | Sum Rank Abundance | Total Abundance   | Rank Biomass    | Total Biomass (g) | Mean SL (cm) | Mean St Dev SL (cm) |
|-----------------------------------------|--------------------|-------------------|-----------------|-------------------|--------------|---------------------|
| <i>Serrapinnus</i> sp. 1*               | 1                  | 1046 <sup>a</sup> | 20 <sup>a</sup> | 450 <sup>a</sup>  | 2.26         | 0.24                |
| <i>Astyanax altiparanae</i>             | 2                  | 778               | 4               | 2695              | 4.24         | 1.45                |
| <i>Moenkhausia</i> aff. <i>forestii</i> | 3                  | 623               | 19              | 498               | 2.73         | 0.50                |
| <i>Hyphessobrycon eques</i>             | 4                  | 420               | 28              | 199               | 2.40         | 0.38                |
| <i>Aphyocharax anisitsi</i>             | 5                  | 575               | 26              | 264               | 2.62         | 0.36                |
| <i>Steindachnerina insculpta</i>        | 6                  | 444               | 3               | 3217              | 5.52         | 2.18                |
| <i>Psellogrammus kennedyi</i> ‡         | 7                  | 861 <sup>a</sup>  | 8 <sup>a</sup>  | 1626 <sup>a</sup> | 3.04         | 0.60                |
| <i>Loricariichthys platymetopon</i>     | 8                  | 129               | 6               | 2327              | 9.38         | 6.16                |
| <i>Roeboides descavadensis</i>          | 9                  | 420               | 15              | 932               | 4.74         | 1.11                |
| <i>Hoplias</i> aff. <i>malabaricus</i>  | 10                 | 57                | 2               | 5938              | 14.70        | 7.18                |
| <i>Serrapinnus</i> sp. 2¶               | n/a                | 327               | 31              | 151               | 2.48         | 0.33                |
| <i>Characidium</i> aff. <i>zebra</i>    | 11                 | 82                | 39              | 37                | 2.69         | 0.64                |
| <i>Serrapinnus notomelas</i> *          | 12                 | 123 <sup>a</sup>  | 38 <sup>a</sup> | 42 <sup>a</sup>   | 2.29         | 0.58                |
| <i>Moenkhausia bonita</i> §             | 13                 | 102 <sup>a</sup>  | 36 <sup>a</sup> | 72 <sup>a</sup>   | 2.65         | 0.34                |
| <i>Acestrorhynchus lacustris</i>        | 14                 | 54                | 9               | 1555              | 11.67        | 3.85                |
| <i>Aphyocharax dentatus</i> †           | 15                 | 161               | 34              | 100               | 2.91         | 0.78                |
| <i>Steindachnerina brevipinna</i>       | 16                 | 165               | 11              | 1480              | 5.95         | 2.33                |
| <i>Pyrhulina australis</i>              | 17                 | 68                | 41              | 32                | 2.59         | 0.46                |
| <i>Serrasalmus marginatus</i>           | 18                 | 26                | 30              | 168               | 3.93         | 3.37                |
| <i>Cichlasoma paranaense</i>            | 19                 | 120               | 10              | 1545              | 5.17         | 2.18                |
| <i>Bryconamericus stramineus</i>        | 20                 | 219               | 25              | 286               | 4.13         | 0.63                |

|                                                 |    |     |    |       |       |      |
|-------------------------------------------------|----|-----|----|-------|-------|------|
| <i>Hyphessobrycon</i> sp.                       | 21 | 70  | 40 | 33    | 2.74  | 0.41 |
| <i>Pimelodella gracilis</i>                     | 22 | 85  | 24 | 328   | 6.38  | 1.74 |
| <i>Leporinus lacustris</i>                      | 23 | 32  | 22 | 377   | 5.72  | 3.09 |
| <i>Brachyhypopomus</i> cf. <i>pinnicaudatus</i> | 24 | 43  | 33 | 104   | 8.43  | 2.42 |
| <i>Gymnotus</i> spp.                            | 25 | 17  | 18 | 565   | 16.66 | 7.03 |
| <i>Cyphocharax nagellii</i>                     | 26 | 12  | 37 | 63    | 4.62  | 1.81 |
| <i>Hoplosternum littoral</i>                    | 27 | 23  | 5  | 2344  | 14.01 | 2.23 |
| <i>Crenicichla britskii</i>                     | 28 | 5   | 46 | 16    | 4.58  | 1.69 |
| <i>Leporinus obtusidens</i>                     | 29 | 6   | 14 | 1200  | 15.60 | 8.91 |
| <i>Laetacara</i> sp.                            | 30 | 55  | 32 | 127   | 3.51  | 0.81 |
| <i>Aphyocharax</i> sp 1†                        | 31 | 14  | 53 | 4     | 2.43  | 0.33 |
| <i>Hoplerythrinus unitaeniatus</i>              | 32 | 6   | 16 | 921   | 18.33 | 4.04 |
| <i>Satanoperca pappaterra</i>                   | 33 | 35  | 45 | 16    | 1.92  | 0.45 |
| <i>Astronotus crassipinnis</i>                  | 34 | 4   | 7  | 1991  | 20.55 | 2.44 |
| <i>Synbranchus marmoratus</i>                   | 35 | 3   | 51 | 8     | ---   | 0.00 |
| <i>Apareidon affinis</i>                        | 36 | 3   | 56 | 2     | 3.10  | 0.95 |
| <i>Characidium</i> sp.                          | 37 | 3   | 57 | 1     | 2.37  | 0.76 |
| <i>Catathyridium jenynsii</i>                   | 38 | 3   | 27 | 218   | 7.33  | 7.94 |
| <i>Pamphorichthys</i> sp.                       | 39 | 5   | 58 | 1     | 1.90  | 0.57 |
| <i>Prochilodus lineatus</i>                     | 40 | 189 | 1  | 15106 | 13.09 | 2.15 |
| <i>Eigenmannia trilineata</i>                   | 41 | 4   | 43 | 24    | 12.75 | 3.15 |
| <i>Sternopygus macrurus</i>                     | 42 | 2   | 54 | 2     | 6.90  | 0.85 |
| <i>Odontostilbe</i> sp.                         | 43 | 6   | 55 | 2     | 2.15  | 0.64 |
| <i>Astyanax schubarti</i>                       | 44 | 2   | 44 | 17    | 6.40  | 0.85 |
| <i>Hoplias</i> sp. 2                            | 45 | 1   | 29 | 183   | 21.00 | ---  |
| <i>Potamotrygon</i> cf. <i>motoro</i>           | 46 | 2   | 13 | 1303  | 22.00 | 1.41 |
| <i>Astyanax</i> aff. <i>fasciatus</i>           | 47 | 2   | 50 | 9     | 7.60  | 0.00 |
| <i>Myloplus tiete</i>                           | 48 | 1   | 52 | 6     | 5.00  | ---  |

|                                    |    |   |     |      |       |      |
|------------------------------------|----|---|-----|------|-------|------|
| <i>Pterygoplichthys anisitsi</i>   | 49 | 1 | 17  | 677  | 32.20 | ---  |
| <i>Serrasalmus maculatus</i>       | 50 | 1 | 23  | 328  | 19.60 | ---  |
| <i>Cyphocharax modestus</i>        | 51 | 2 | 42  | 32   | 7.35  | 0.21 |
| <i>Pseudoplatystoma corruscans</i> | 52 | 3 | 12  | 1384 | 32.37 | 9.02 |
| <i>Parauchenipterus galeatus</i>   | 53 | 1 | 48  | 11   | 6.70  | ---  |
| <i>Hoplias</i> sp. 1               | 54 | 1 | 21  | 448  | 30.00 | ---  |
| <i>Pimelodella avanhandavae</i>    | 55 | 1 | 49  | 9    | 9.00  | ---  |
| <i>Salminus brasiliensis</i>       | 56 | 1 | --- | ---  | ---   | 0.00 |
| <i>Metynnis lippincottianus</i>    | 57 | 2 | 47  | 15   | 5.50  | 0.42 |
| <i>Hypostomus ancistroides</i>     | 58 | 1 | 35  | 99   | 15.00 | ---  |

Nomenclature follows Graca, W. J. and C. S. Pavanelli, editors. 2007. Peixes da planície de inundação do alto rio Paraná e áreas adjacentes. Editora do Universidade Estadual de Maringá, Maringá, Brazil

\* Taxonomic ambiguity among *Serrapinnus* species early in the data set likely caused misidentification between *Serrapinnus notomelas* and *Serrapinnus* sp. 1  
Therefore, species exchanged positions based on current observed abundances in isolated lagoons

† Taxonomic ambiguity among *Aphyocharax* species early in the data set likely caused misidentification between *Aphyocharax dentatus* and *Aphyocharax* sp. 1  
Therefore, species exchanged positions based on current observed abundances in isolated lagoons

‡ Replaced *Moenkhausia* aff. *intermedia* due to captive sensitivity of this species. *Psellogrammus kennedyi* is similar in ecology and size and currently found in and abundances similar to *Moenkhausia* aff. *intermedia*

§ Replaced *Hemigrammus marginatus* due to captive sensitivity of this species. *Moenkhausia bonita* is similar in ecology and size and currently found in and abundances similar to *Hemigrammus marginatus*

¶ Species removed for no longer found in isolated lagoons

<sup>a</sup> Value is reflective of species it replaced

--- No information
