# Supplementary material for: Loss of Rare Fish Species from Tropical Floodplain Food Webs Affects Community Structure and Ecosystem Multifunctionality in a Mesocosm Experiment
Source: PLoS One. 2014 Jan 8;9(1):e84568. doi: 10.1371/journal.pone.0084568 (PMC3885587; doi:10.1371/journal.pone.0084568)
Supplement: Table S3 — Initial and final abundances and biomasses for fish species in each experimental replicate. Biomass values (g) are in parentheses. (XLSX) [file pone.0084568.s005.xlsx]

## Sheet: Sheet1
Table S3. Initial and final abundances and biomasses for fish species in each experimental replicate. Biomass values (g) are in parentheses.
Initial
Treatment	2	6	10	14	18
Serrapinnus sp 1	45 (13.5)	27 (8.1)	18 (5.4)	13 (3.9)	10 (3.0)
A. altiparanae	20 (77.8)	16 (62.3)	12 (46.7)	10 (38.9)	8 (31.1)
M. forestii		10 (10.5)	10 (10.5)	9 (9.5)	8 (8.4)
H. eques		5 (2.7)	7 (3.8)	7 (3.8)	6 (3.3)
A. anisitsi		4 (2.1)	6 (3.2)	5 (2.6)	6 (3.2)
S. insculpta		3 (28.9)	3 (28.9)	5 (48.1)	4 (38.5)
P. kennedyi			3 (3.0)	4 (4.0)	4 (4.0)
L. platymetopon			2 (115.5)	3 (173.2)	4 (230.9)
R. descalvadensis			2 (6.7)	2 (6.7)	3 (10.0)
H. malabaricus			2 (218.9)	2 (218.9)	2 (218.9)
C. zebra				2 (4.0)	2 (4.0)
S. notomelas				1 (0.5)	2 (0.9)
M. bonita				1 (2.7)	1 (2.7)
A. lacustris				1 (48.1)	1 (48.1)
A. dentatus					1 (0.8)
S. brevipinna					1 (5.3)
P. australis					1 (0.8)
S. marginatus					1 (18.2)
Total	65 (91.3)	65 (114.6)	65 (442.4)	65 (564.9)	65 (632.1)
Final
Treatment	2				6				10				14				18
Serrapinnus sp 1	43 (12.9)	26 (7.8)	38 (11.4)	34 (10.2)	21 (6.3)	22 (6.6)	11 (3.3)	24 (7.2)	7 (2.1)	15 (4.5)	13 (3.9)	10 (3.0)	11 (3.3)	6 (1.8)	13 (3.9)	13 (3.9)	10 (3.0)	0 (0.0)	9 (2.7)	9 (2.7)
A. altiparanae	18 (70.0)	5 (19.5)	12 (46.7)	14 (54.5)	16 (62.3)	8 (31.1)	2 (7.8)	13 (50.6)	0 (0.0)	0 (0.0)	1 (3.9)	2 (7.8)	1 (3.9)	0 (0.0)	3 (11.7)	5 (19.5)	7 (27.2)	6 (23.3)	6 (23.3)	6 (23.3)
M. forestii					5 (5.3)	5 (5.3)	0 (0.0)	3 (3.2)	1 (1.1)	7 (7.4)	5 (5.3)	6 (6.3)	1 (1.1)	1 (1.1)	2 (2.1)	5 (5.3)	8 (8.4)	6 (6.3)	7 (7.4)	7 (7.4)
H. eques					0 (0.0)	0 (0.0)	0 (0.0)	4 (2.2)	0 (0.0)	3 (1.6)	7 (3.8)	7 (3.8)	4 (2.2)	3 (1.6)	6 (3.3)	4 (2.2)	5 (2.7)	1 (0.5)	3 (1.6)	3 (1.6)
A. anisitsi					0 (0.0)	0 (0.0)	0 (0.0)	2 (1.1)	0 (0.0)	2 (1.1)	2 (1.1)	1 (0.5)	2 (1.1)	3 (1.6)	3 (1.6)	5 (2.6)	6 (3.2)	2 (1.1)	3 (1.6)	5 (2.6)
S. insculpta					3 (28.9)	1 (9.6)	0 (0.0)	3 (28.9)	1 (9.6)	2 (19.2)	2 (19.2)	1 (9.6)	0 (0.0)	0 (0.0)	0 (0.0)	3 (28.9)	1 (9.6)	3 (28.9)	3 (28.9)	2 (19.2)
P. kennedyi									0 (0.0)	0 (0.0)	0 (0.0)	2 (2.0)	0 (0.0)	0 (0.0)	0 (0.0)	0 (0.0)	4 (4.0)	4 (4.0)	3 (3.0)	2 (2.0)
L. platymetopon									1 (57.7)	1 (57.7)	2 (115.5)	2 (115.5)	2 (115.5)	3 (173.2)	3 (173.2)	3 (173.2)	3 (173.2)	3 (173.2)	4 (230.9)	4 (230.9)
R. descalvadensis									0 (0.0)	1 (3.3)	0 (0.0)	2 (6.7)	0 (0.0)	1 (3.3)	0 (0.0)	1 (3.3)	3 (10.0)	3 (10.0)	3 (10.0)	3 (10.0)
H. malabaricus									1 (109.4)	2 (218.9)	2 (218.9)	2 (218.9)	2 (218.9)	2 (218.9)	2 (218.9)	2 (218.9)	2 (218.9)	2 (218.9)	2 (218.9)	2 (218.9)
C. zebra													1 (2.0)	0 (0.0)	2 (4.0)	2 (4.0)	1 (2.0)	1 (2.0)	1 (2.0)	2 (4.0)
S. notomelas													1 (0.5)	1 (0.5)	0 (0.0)	1 (0.5)	2 (0.9)	0 (0.0)	1 (0.5)	2 (0.9)
M. bonita													1 (2.7)	0 (0.0)	0 (0.0)	0 (0.0)	1 (2.7)	1 (2.7)	1 (2.7)	1 (2.7)
A. lacustris													1 (48.1)	0 (0.0)	1 (48.1)	0 (0.0)	0 (0.0)	1 (48.1)	0 (0.0)	0 (0.0)
A. dentatus																	1 (0.8)	1 (0.8)	1 (0.8)	1 (0.8)
S. brevipinna																	0 (0.0)	1 (5.3)	1 (5.3)	0 (0.0)
P. australis																	1 (0.8)	0 (0.0)	0 (0.0)	0 (0.0)
S. marginatus																	1 (18.2)	1 (18.2)	1 (18.2)	1 (18.2)
Total	61 (82.9)	31 (27.3)	50 (58.1)	48 (64.7)	45 (102.7)	36 (52.6)	13 (11.1)	49 (93.0)	11 (179.9)	33 (313.7)	34 (371.5)	35 (374.1)	27 (399.1)	20 (401.9)	35 (466.7)	44 (462.1)	56 (485.7)	36 (543.3)	49 (557.8)	50 (545.4)
